# Supplementary figures and images for: The cell adhesion molecule Sdk1 shapes assembly of a retinal circuit that detects localized edges
Source: eLife journal article supplement (doi:10.7554/elife.70870), 2021-09-21

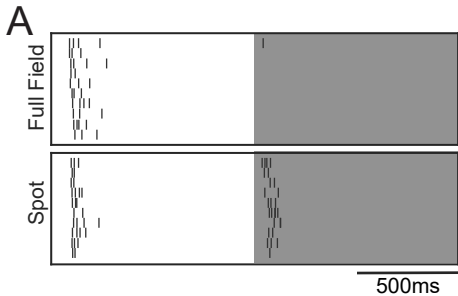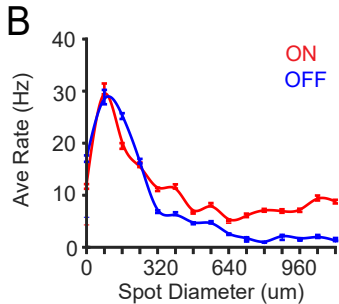

Supplement: supp [file elife-70870-supp-v1.zip]

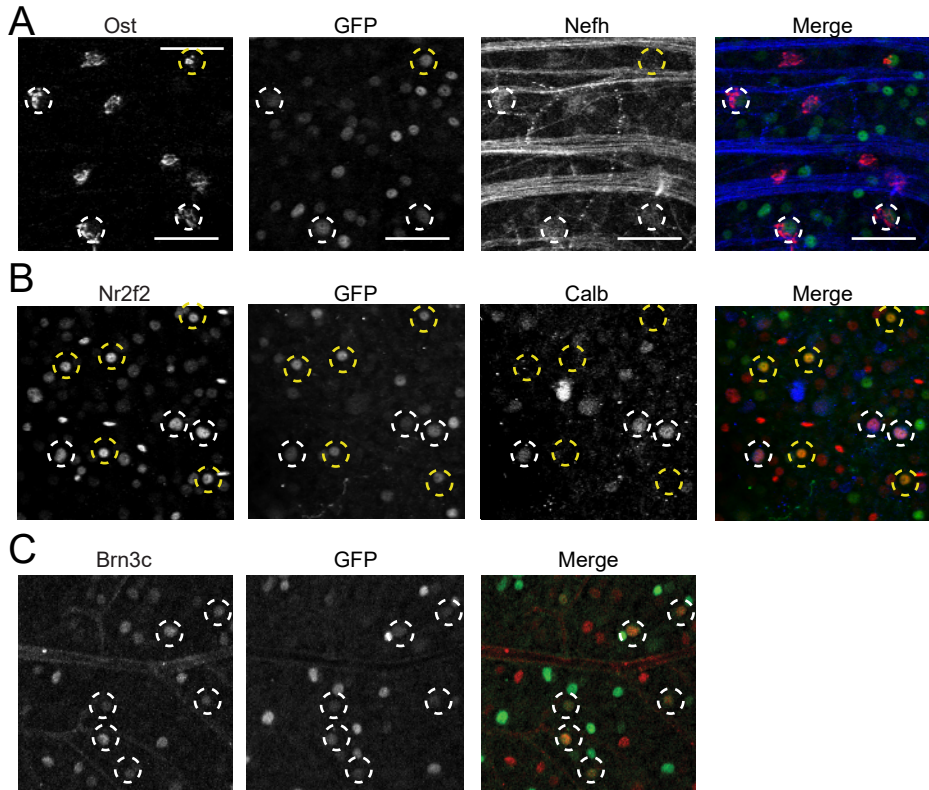

Rochon et al., Figure 1 --figure supplement 2

Supplement: supp [file elife-70870-supp-v1.zip]

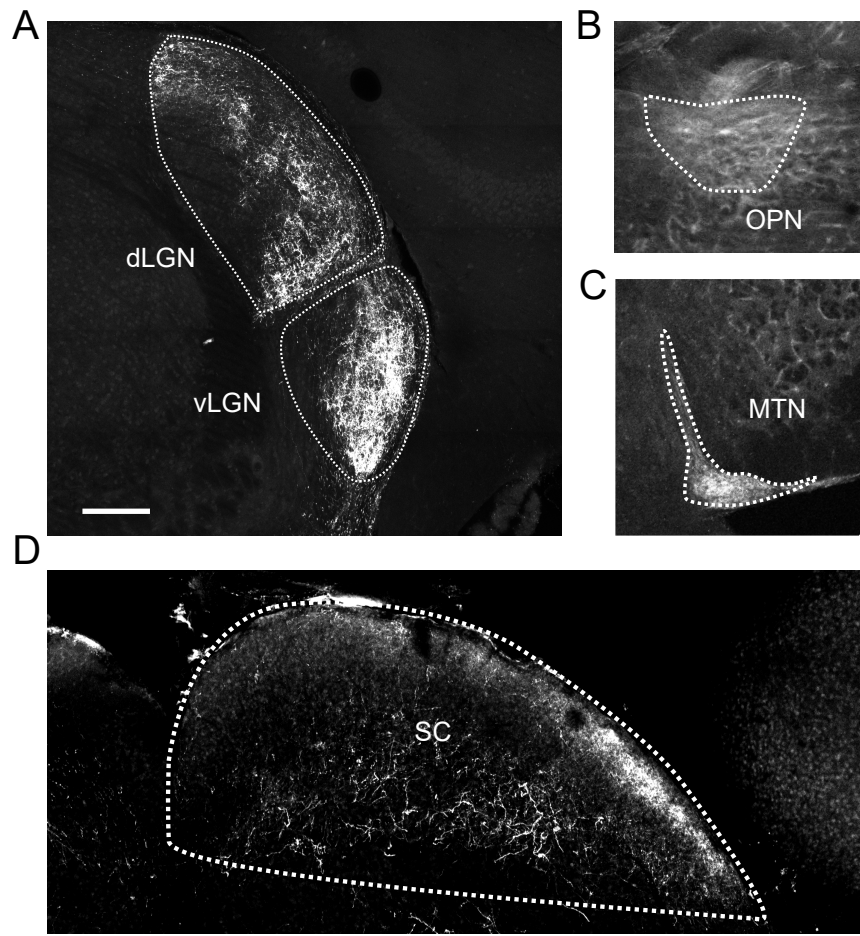

Rochon et al., Figure 1 --figure supplement 3

Supplement: supp [file elife-70870-supp-v1.zip]

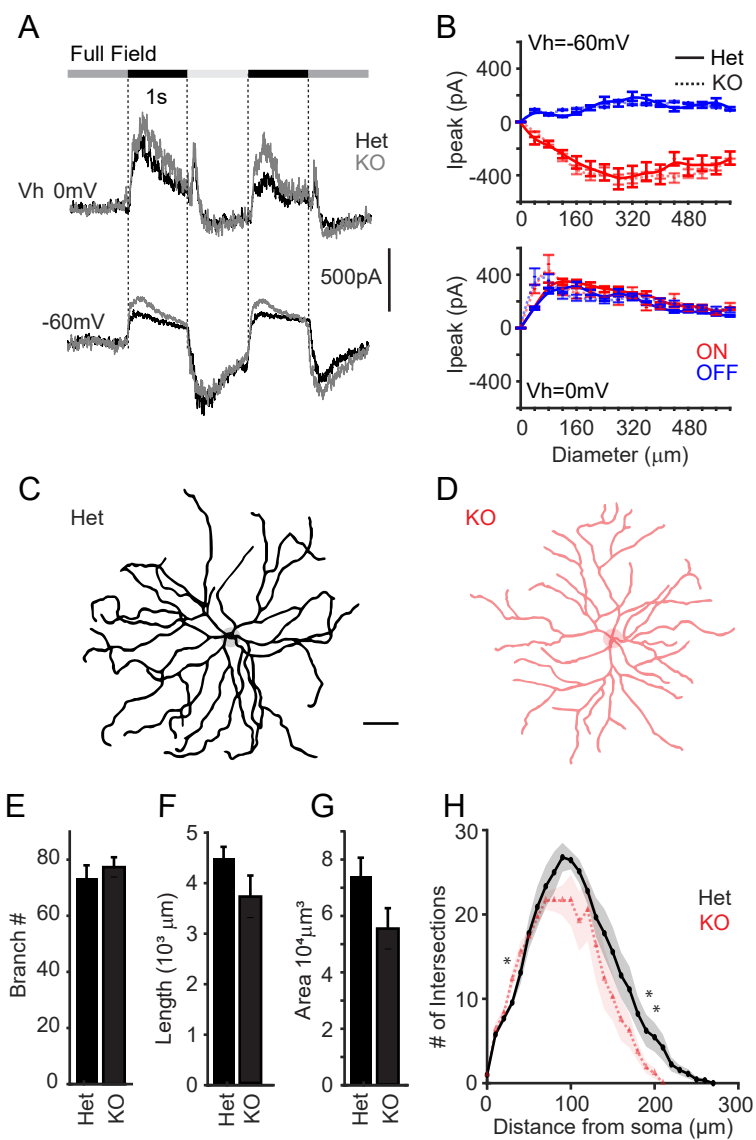

Supplement: supp [file elife-70870-supp-v1.zip]

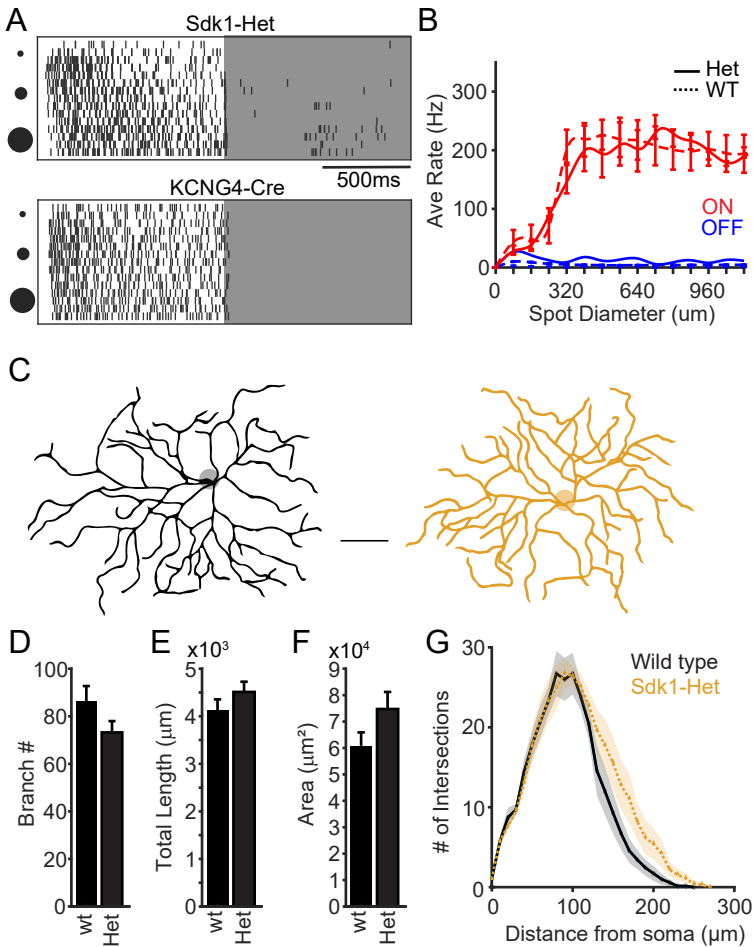

Supplement: supp [file elife-70870-supp-v1.zip]

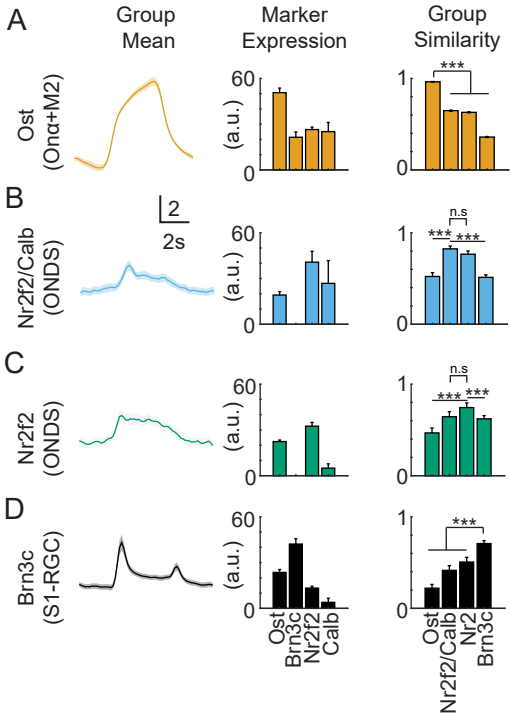

Supplement: supp [file elife-70870-supp-v1.zip]

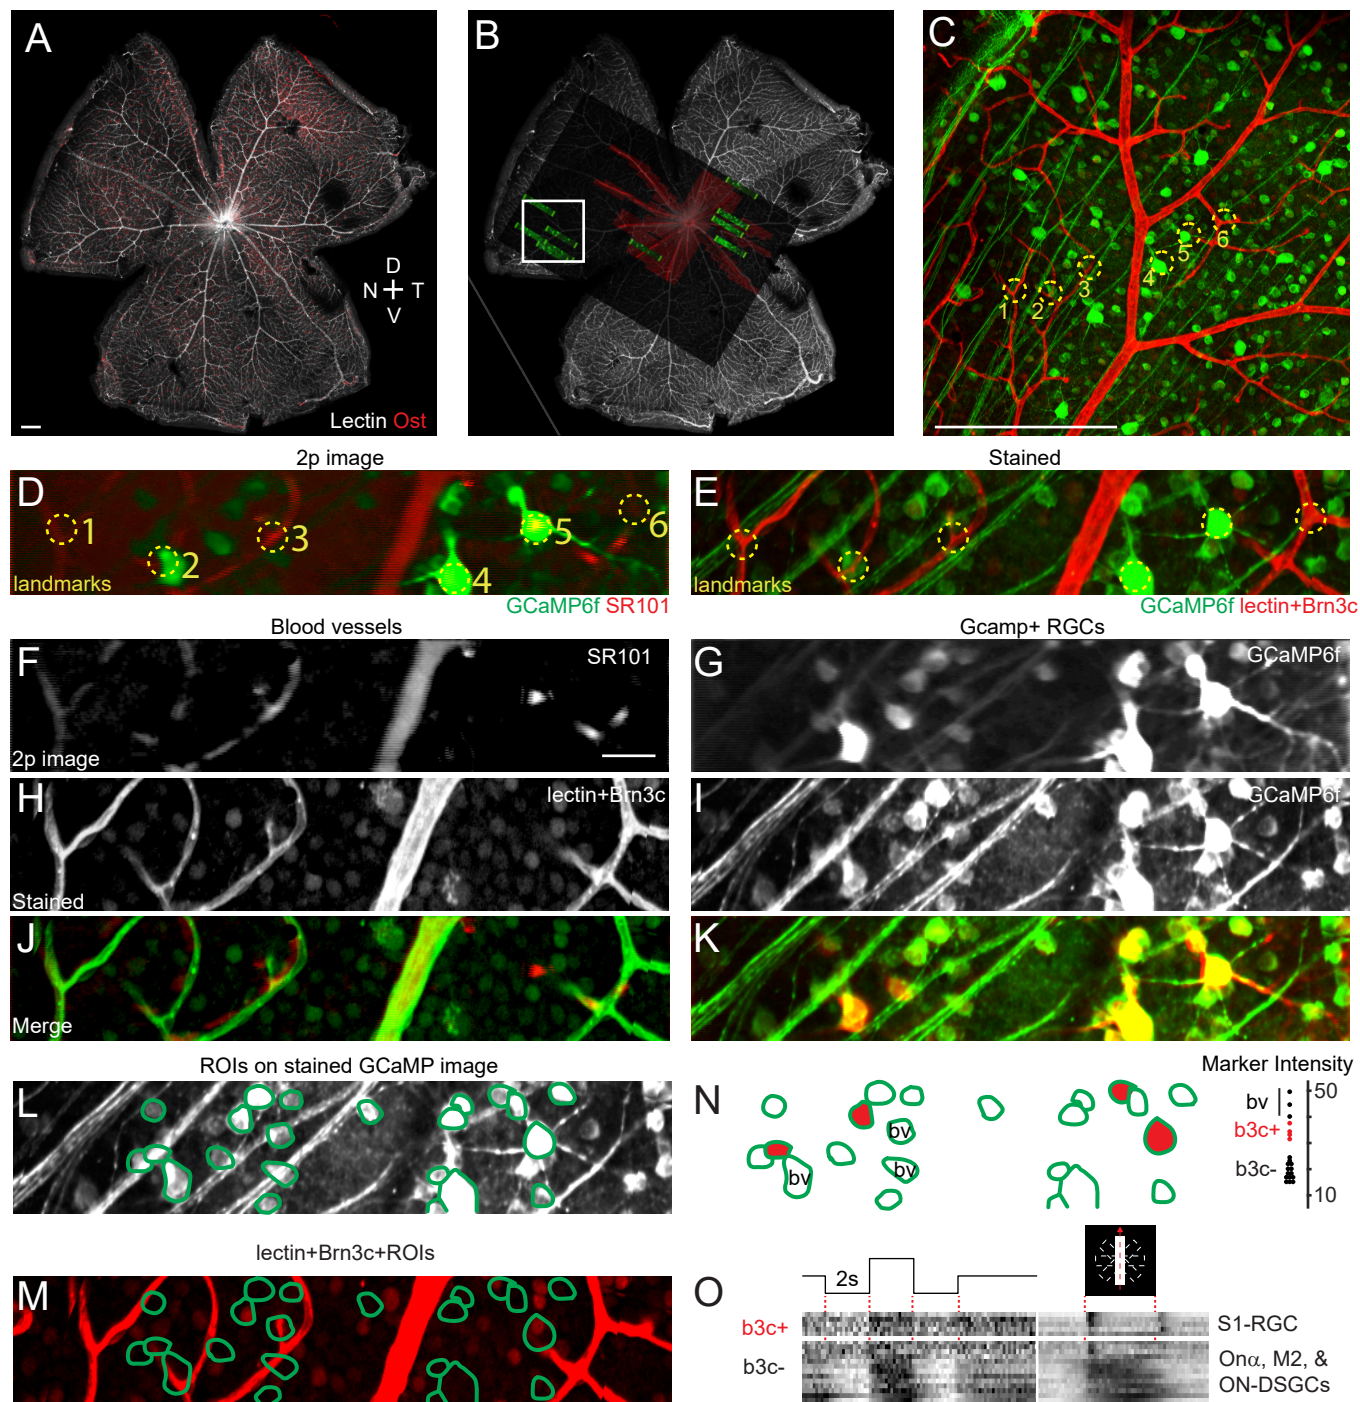

Rochon et al., Figure 2 --figure supplement 1

Supplement: supp [file elife-70870-supp-v1.zip]

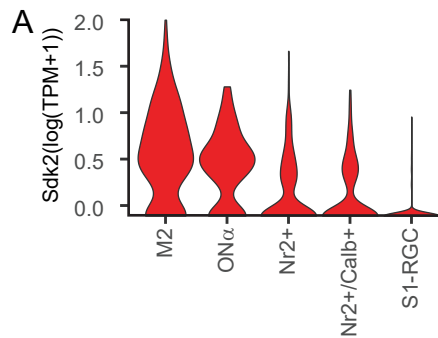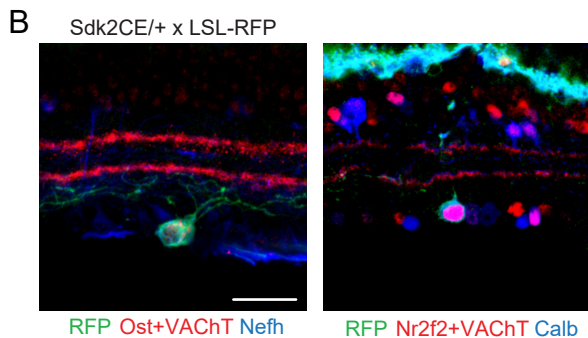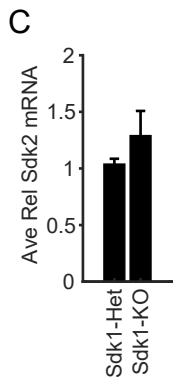

Supplement: supp [file elife-70870-supp-v1.zip]

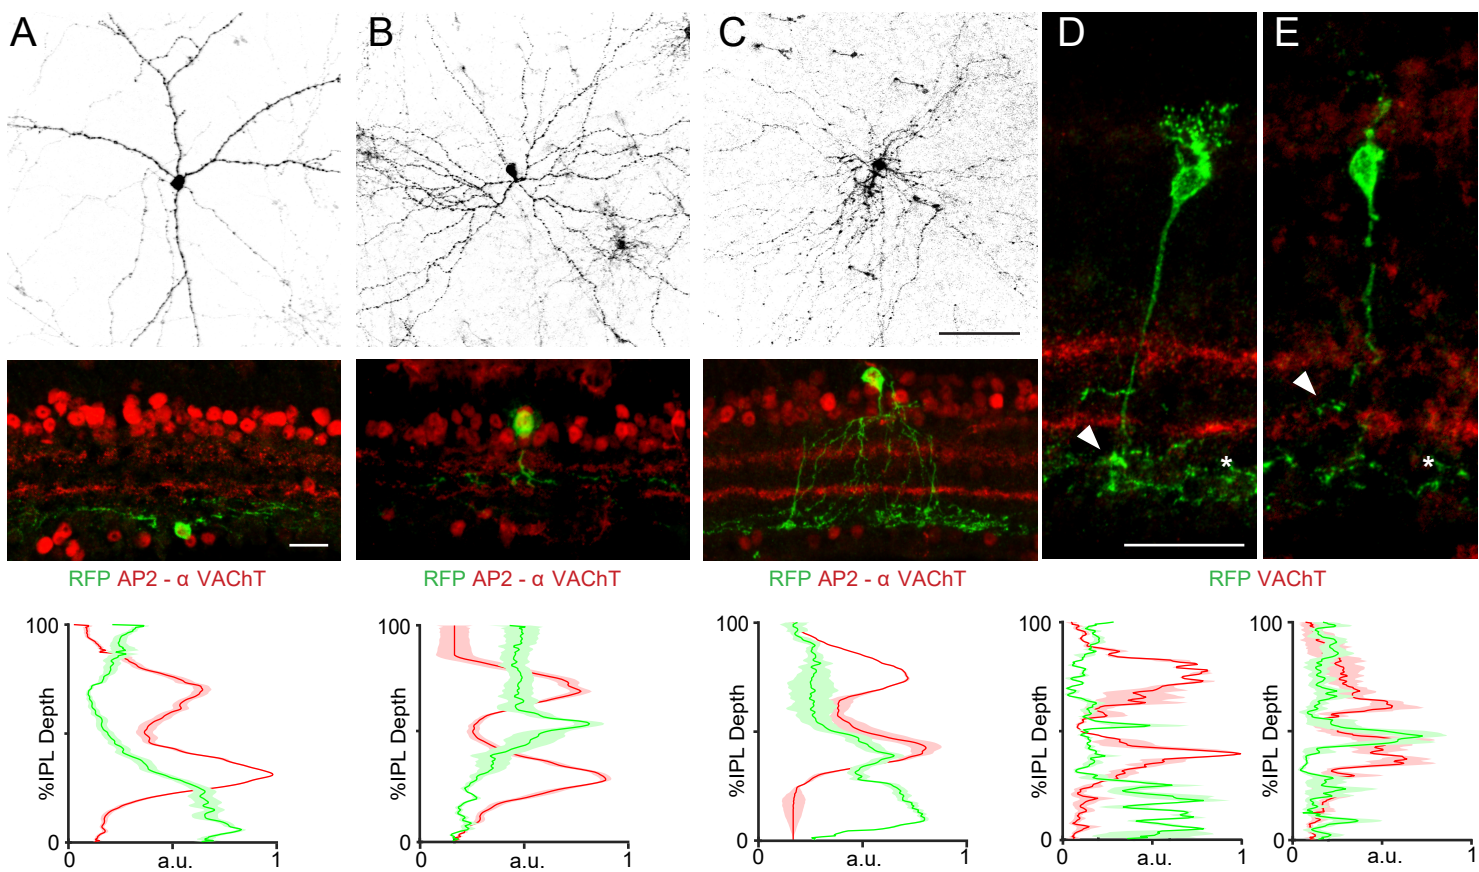

Supplement: supp [file elife-70870-supp-v1.zip]

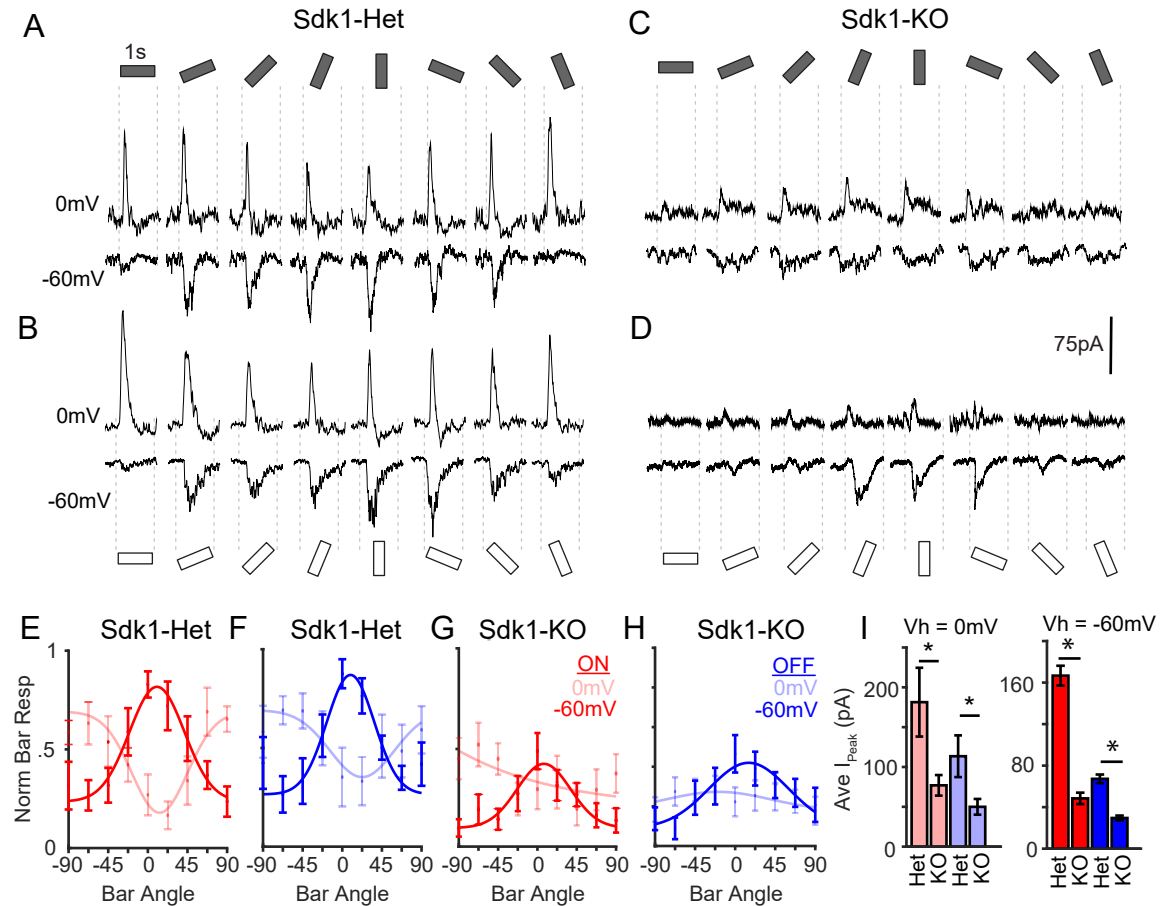

Supplement: supp [file elife-70870-supp-v1.zip]

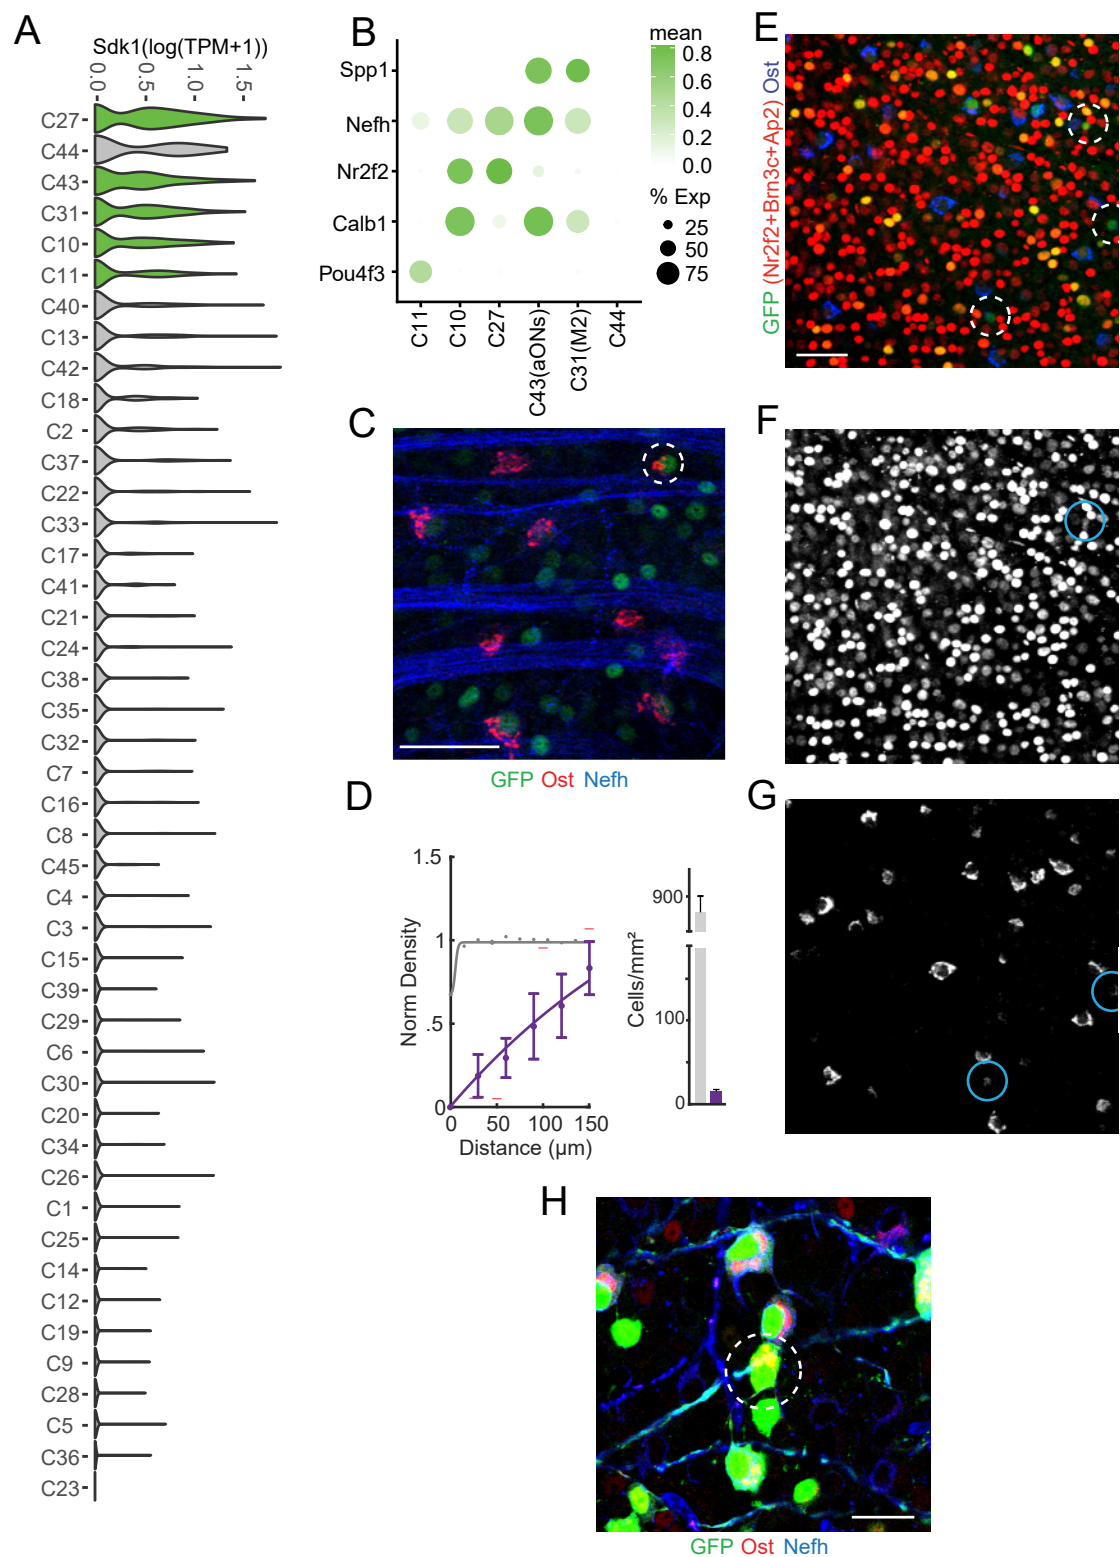

Supplement: supp [file elife-70870-supp-v1.zip]

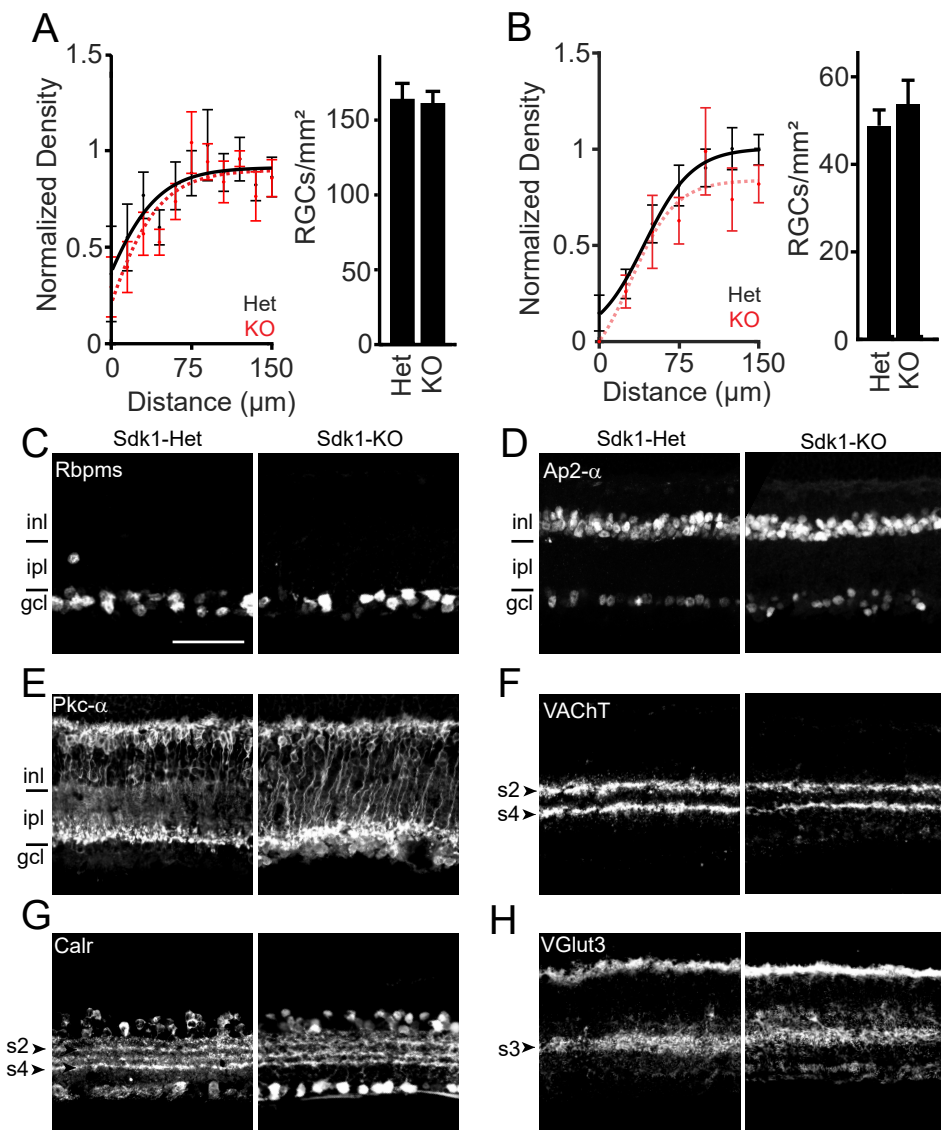

Supplement: supp [file elife-70870-supp-v1.zip]
